# Supplementary material
Source: publisher site journal article supplement (http://www.degruyter.com/publication/journal_key/BIOL/downloadAsset/BIOL_EACR%20The%20Tumour%20Ecosystem%202024.pdf)
Supplement: Supplementary file 1 [file BIOL_EACR%20The%20Tumour%20Ecosystem%202024.pdf]

EACR Conference

# THE TUMOUR ECOSYSTEM

19 - 21 March 2024, Bergamo

DE  
|  
G

## **Short description:**

This meeting will cover the latest exciting breakthroughs on multiple aspects of the tumour microenvironment, including the intricate interactions of cancer cells with the immune system and with specific stromal cells in multiple organs. We will also highlight novel insights into tumour-host interactions including changes in metabolism, the nervous system and response to therapy.

Join us to hear from world experts who are at the forefront of the tumour microenvironment field, sharing their latest discoveries and insights about this cutting-edge research and its implications for novel cancer therapies. Featured topics include the role of inflammation and immunity in tumour progression and metastasis, organ-specific stromal cells that support tumour progression, metabolic changes in the tumour microenvironment, tumour-host interactions in response to therapy, cancer interactions with the nervous system, and dormancy and metastasis.

### **Speakers:**

Speakers: Leila Akkari (Netherlands Cancer Institute, Netherlands), Jean Albregues (Université Côte d'Azur, France), Adrienne Boire (Memorial Sloan Kettering Cancer Center, USA), Karin de Visser (NKI Amsterdam, Netherlands), Neta Erez (Tel Aviv University, Israel), Doug Hanahan (Ludwig Cancer Research, Switzerland), Clare Isacke (ICR, UK), Mariam Jamal-Hanjani (UCL, UK), Johanna Joyce (University of Lausanne, Switzerland), Erik Sahai (The Francis Crick Institute, UK), Ruth Scherz-Shouval (Weizmann Institute, Israel), Yuval Shaked (Tenion - Israel Institute of Technology, Israel), Mariia Yuneva (The Francis Crick Institute, UK), and Sara Zanivan (CRUK Beatson Institute, UK)

***Conference website: [click here](#)***

*Contact Person: Hannah Barrs <[hannah.barrs@eacr.org](mailto:hannah.barrs@eacr.org)>*

**REGISTRATION  
DEADLINE:**

**19/02/2024**

**EACR**

European Association  
for Cancer Research

**PROMOTIONAL PARTNER:**

DE  
|  
G

**DE GRUYTER**

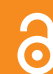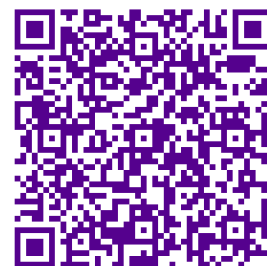

**REGISTER HERE**

[degruyter.com/biol](https://degruyter.com/biol)

EACR Conference

DE  
|  
G

# THE TUMOUR ECOSYSTEM

19 - 21 March 2024, Bergamo

As a promotional partner of this meeting, De Gruyter's Open Access journal, Open Life Sciences, offers all participants a 30% discount for Article Processing Charges, for all manuscripts submitted before June 30th, 2024.

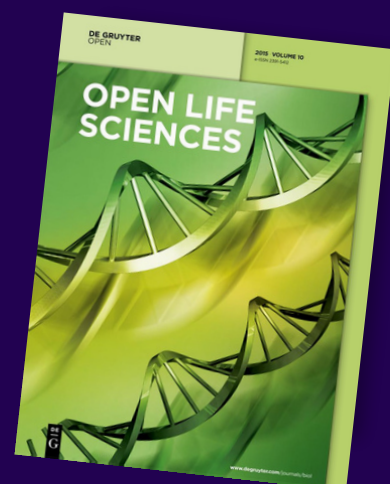

## How to submit

Authors are kindly invited to submit their contribution via online submission system Editorial Manager available at:  
<https://www.editorialmanager.com/openbiol/default1.aspx>

SUBMISSION  
DEADLINE:

30/06/2024

Please remember to select: SI: TUMOUR ECOSYSTEM to ensure that your manuscript is processed with the highest priority and that discount is applied.

PROMOTIONAL PARTNER

EACR

European Association  
for Cancer Research

DE  
|  
G

DE GRUYTER

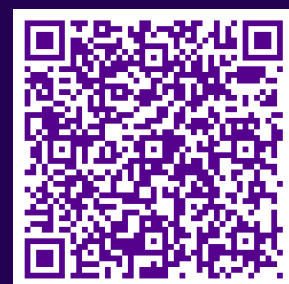

REGISTER HERE

[degruyter.com/biol](https://degruyter.com/biol)
